# Supplementary material for: Polypeptoid Monomer Sequence and Chemical Composition as Independent Controls of Interfacial Tension and Elasticity at Air/Fluid Interfaces
Source: PubMed Central journal article supplement (PMC11270983; doi:10.1021/acs.langmuir.4c02195), 2024-07-12
Supplement: la4c02195_si_001.pdf [file la4c02195_si_001.pdf]

**Supporting Information - Polypeptoid monomer sequence and chemical composition as independent controls of interfacial tension and elasticity at air/fluid interfaces**

Michal Roguski<sup>1†</sup>, Michael L. Davidson<sup>1†</sup>, Audra J. DeStefano<sup>2</sup>, Rachel A. Segalman<sup>2,3</sup>,  
and Lynn M. Walker\*<sup>4</sup>

<sup>1</sup> Department of Chemical Engineering, Carnegie Mellon University, Pittsburgh, PA, 15213

<sup>2</sup> Department of Chemical Engineering, University of California, Santa Barbara, CA, 93106

<sup>3</sup> Department of Materials, University of California, Santa Barbara, CA, 93106

<sup>4</sup> Department of Chemical Engineering & Materials Science, University of Minnesota,  
Minneapolis, MN, 55455

† shared first authorship, these authors contributed equally.

\*corresponding author: [lmwalker@umn.edu](mailto:lmwalker@umn.edu)

**Details:**

This supporting information contains 2 pages and 1 figure.

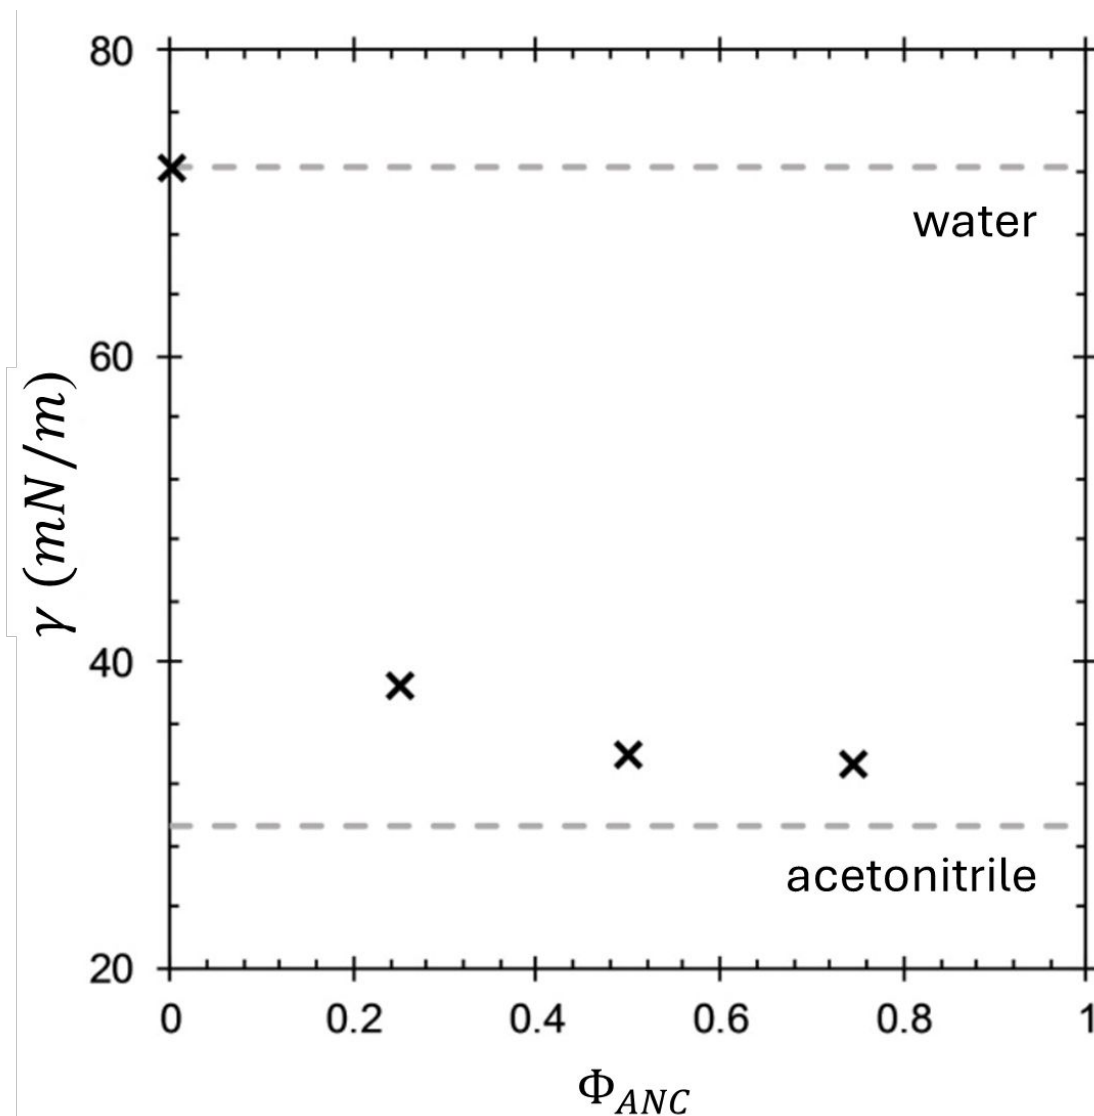

Figure S1. Surface tension of acetonitrile/water mixtures measured with the microtensiometer. Dashed lines are the surface tensions of the pure solvents.<sup>1</sup>

Figure S1 shows the results of measurements of the interfacial tension between air and mixtures of acetonitrile and water of different volume fractions of acetonitrile ( $\phi_{ACN}$ ). The dashed lines show values of the interfacial tension of pure components (72.2 mN/m for pure water, and 29.3 mN/m for pure acetonitrile).

#### References:

1. Tahery, R.; Modarress, H.; Satherley, J. J. Chem. Eng. Data 2006, 51 (3), 1039–1042
